# Supplementary material for: Aberrantly hydroxymethylated differentially expressed genes and the associated protein pathways in osteoarthritis
Source: PeerJ journal article supplement (doi:10.7717/peerj.6425), 2019-02-25
Supplement: Supplemental_Information_2.zip [file Supplemental_Information_2.zip]

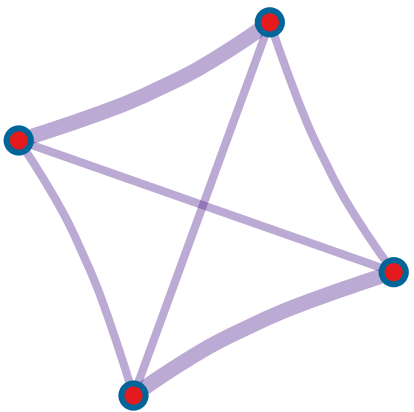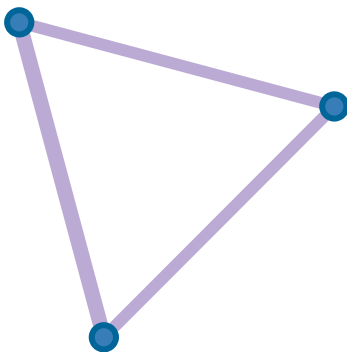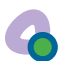

- cellular response to oxidative stress
- nucleobase-containing small molecule metabolic pro
- oxidoreductase activity

 created by  
<http://metascape.org>
