# Supplementary material for: Aberrantly hydroxymethylated differentially expressed genes and the associated protein pathways in osteoarthritis
Source: PeerJ journal article supplement (doi:10.7717/peerj.6425), 2019-02-25
Supplement: Supplemental_Information_2.zip [file Supplemental_Information_2.zip]

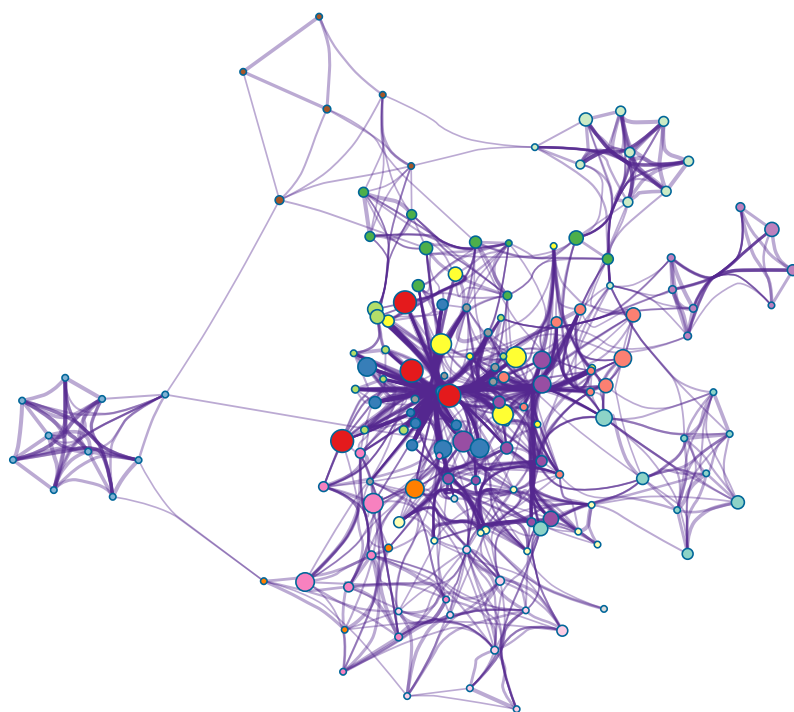

- extracellular matrix
- extracellular matrix structural constituent
- basement membrane
- skeletal system development
- ossification
- blood vessel development
- collagen binding
- response to growth factor
- endodermal cell differentiation
- heart morphogenesis
- bone development
- calcium ion binding
- head development
- extracellular matrix structural constituent conferring c
- extracellular matrix binding
- wound healing
- osteoblast differentiation
- collagen metabolic process
- synapse part
- cell morphogenesis involved in differentiation
