# Supplementary figures and images for: Aberrantly hydroxymethylated differentially expressed genes and the associated protein pathways in osteoarthritis
Source: PeerJ journal article supplement (doi:10.7717/peerj.6425), 2019-02-25

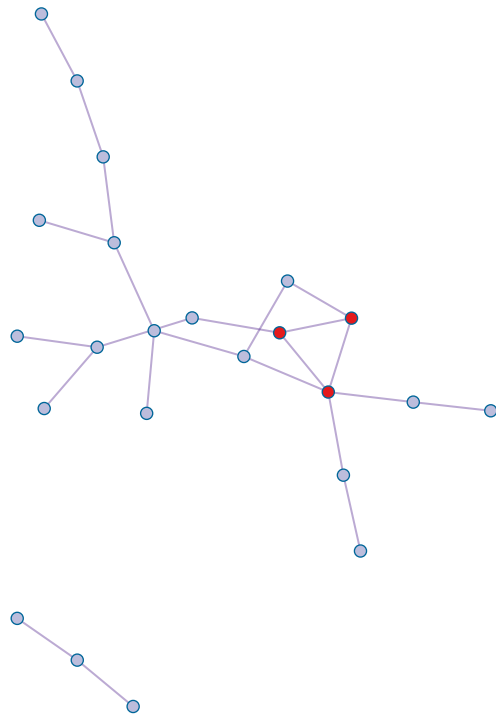

■ MCODE1  
created by  
<http://metascape.org>

Supplement: Supplemental_Information_2.zip [file Supplemental_Information_2.zip]

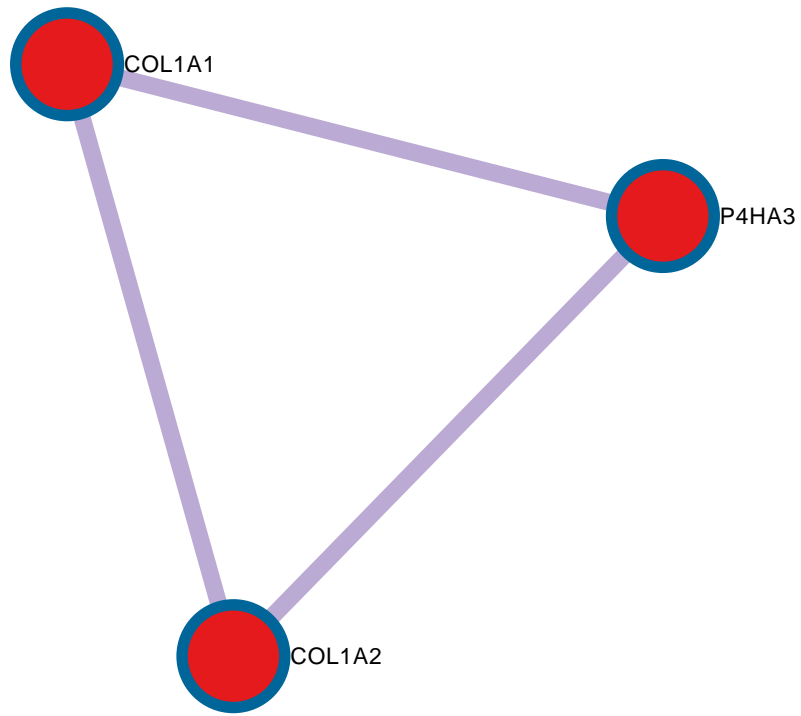

■ MCODE1  
created by  
<http://metascape.org>

Supplement: Supplemental_Information_2.zip [file Supplemental_Information_2.zip]

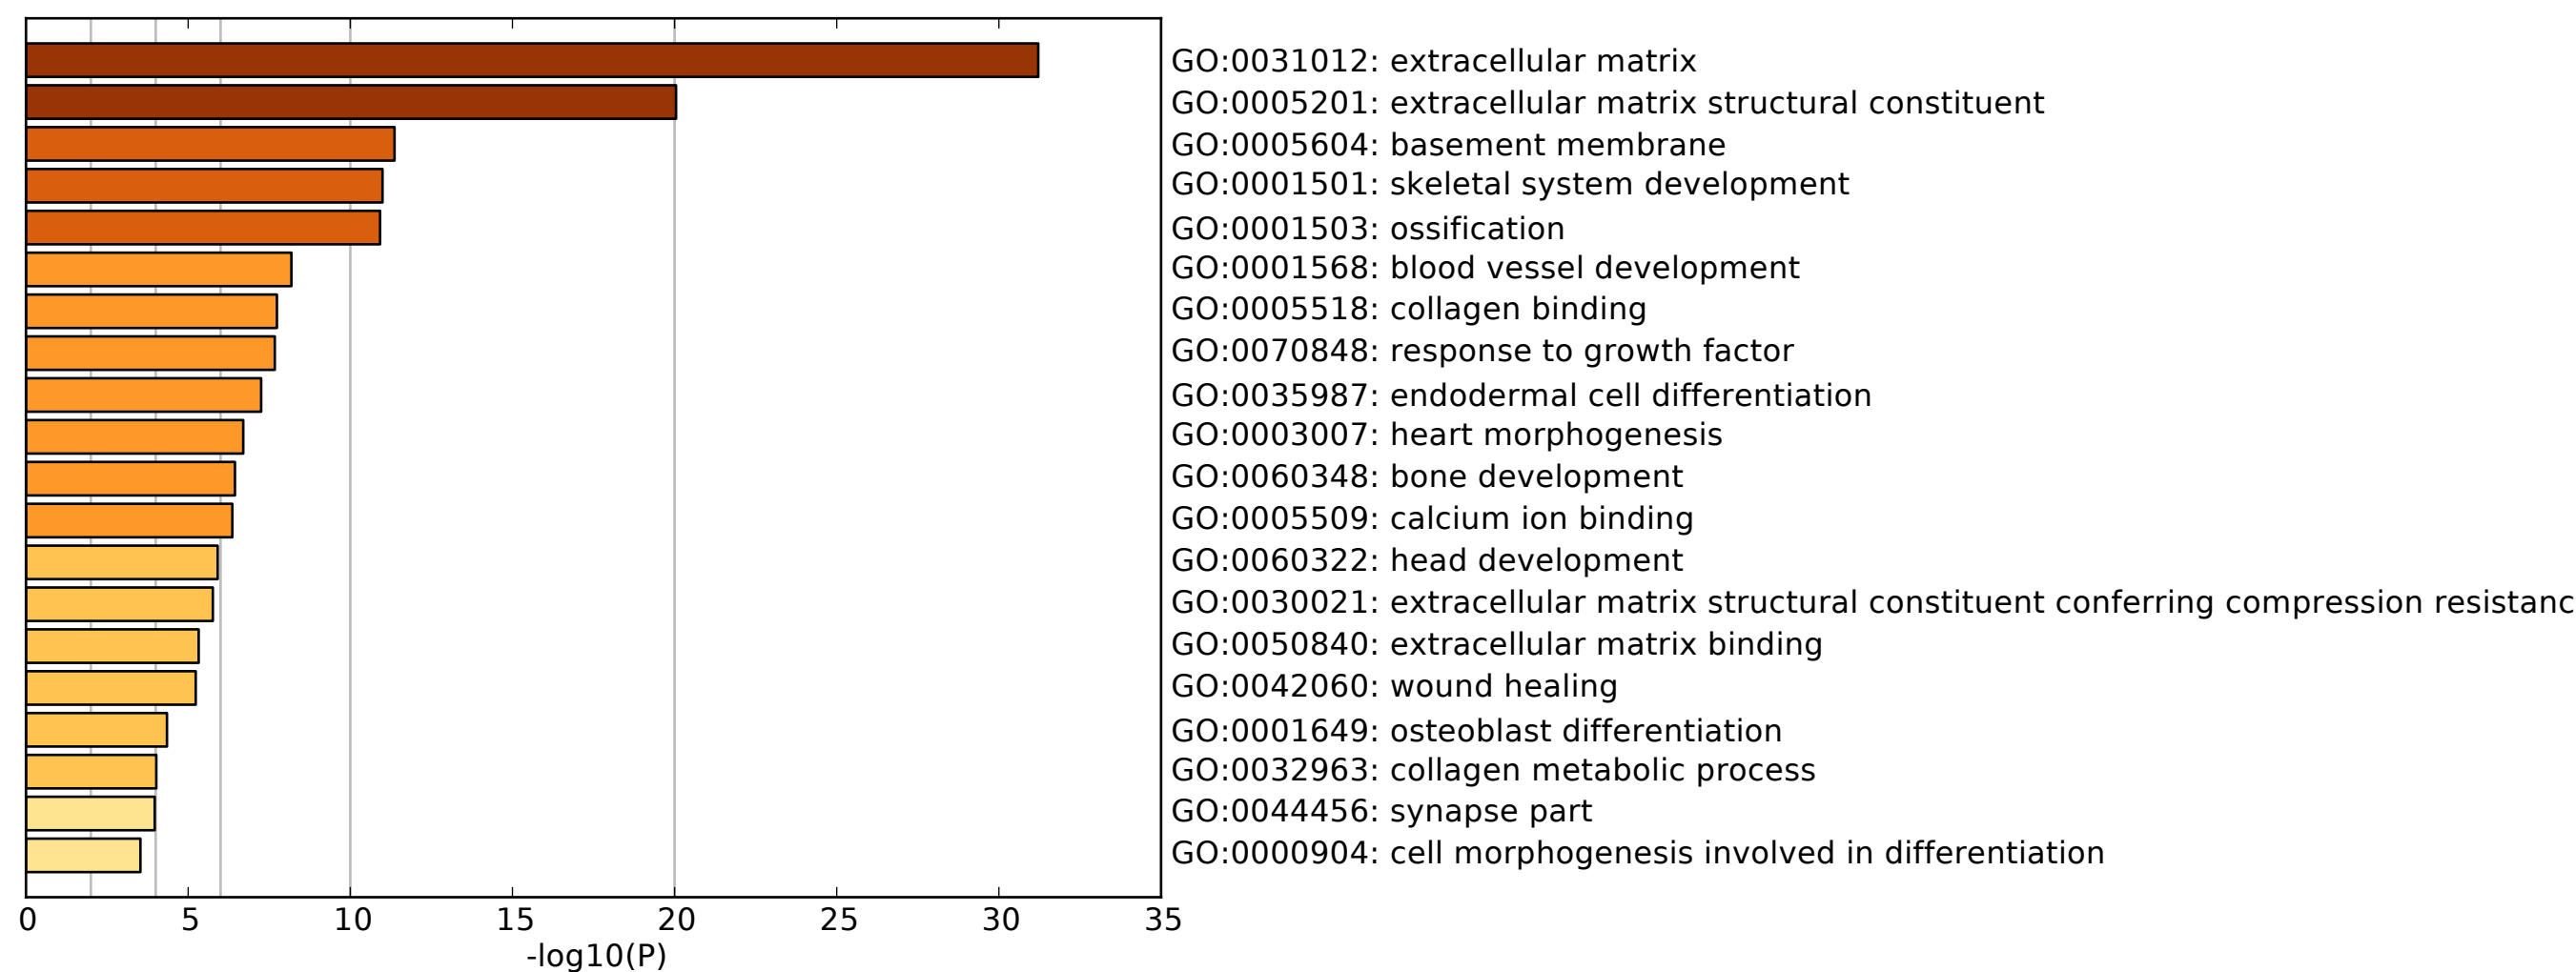

Supplement: Supplemental_Information_2.zip [file Supplemental_Information_2.zip]

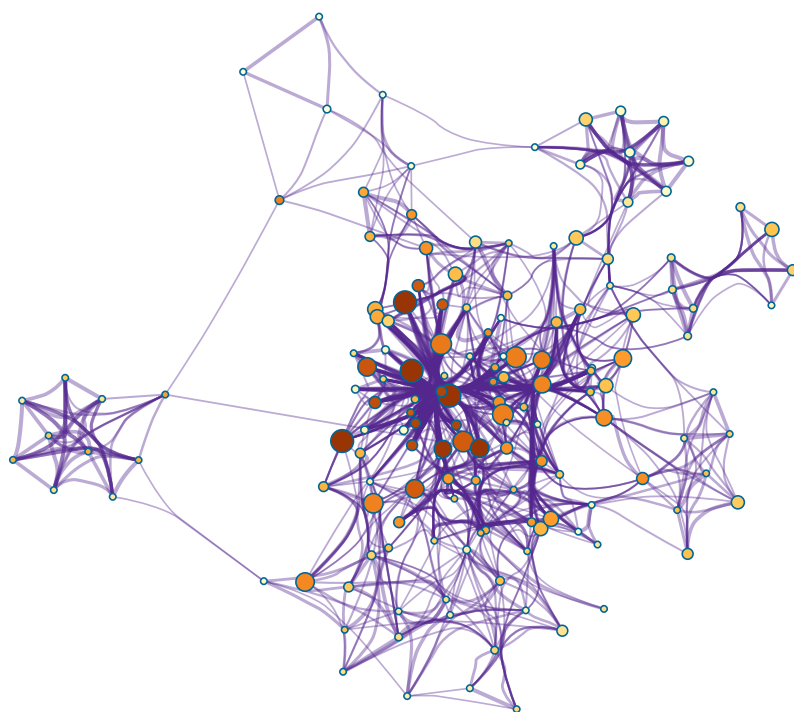

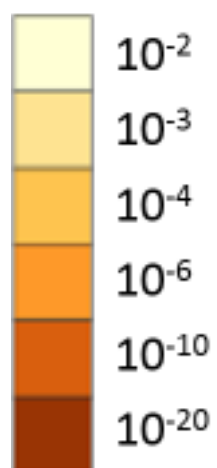

 created by  
<http://metascape.org>

Supplement: Supplemental_Information_2.zip [file Supplemental_Information_2.zip]

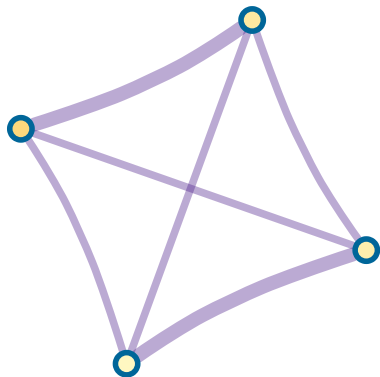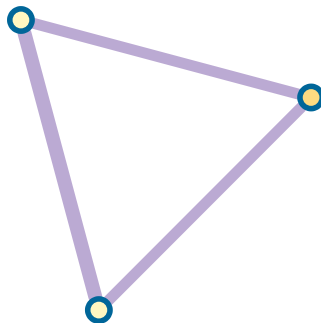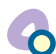

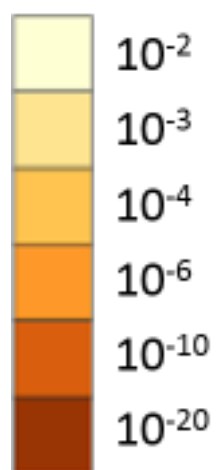

 created by  
<http://metascape.org>

Supplement: Supplemental_Information_2.zip [file Supplemental_Information_2.zip]

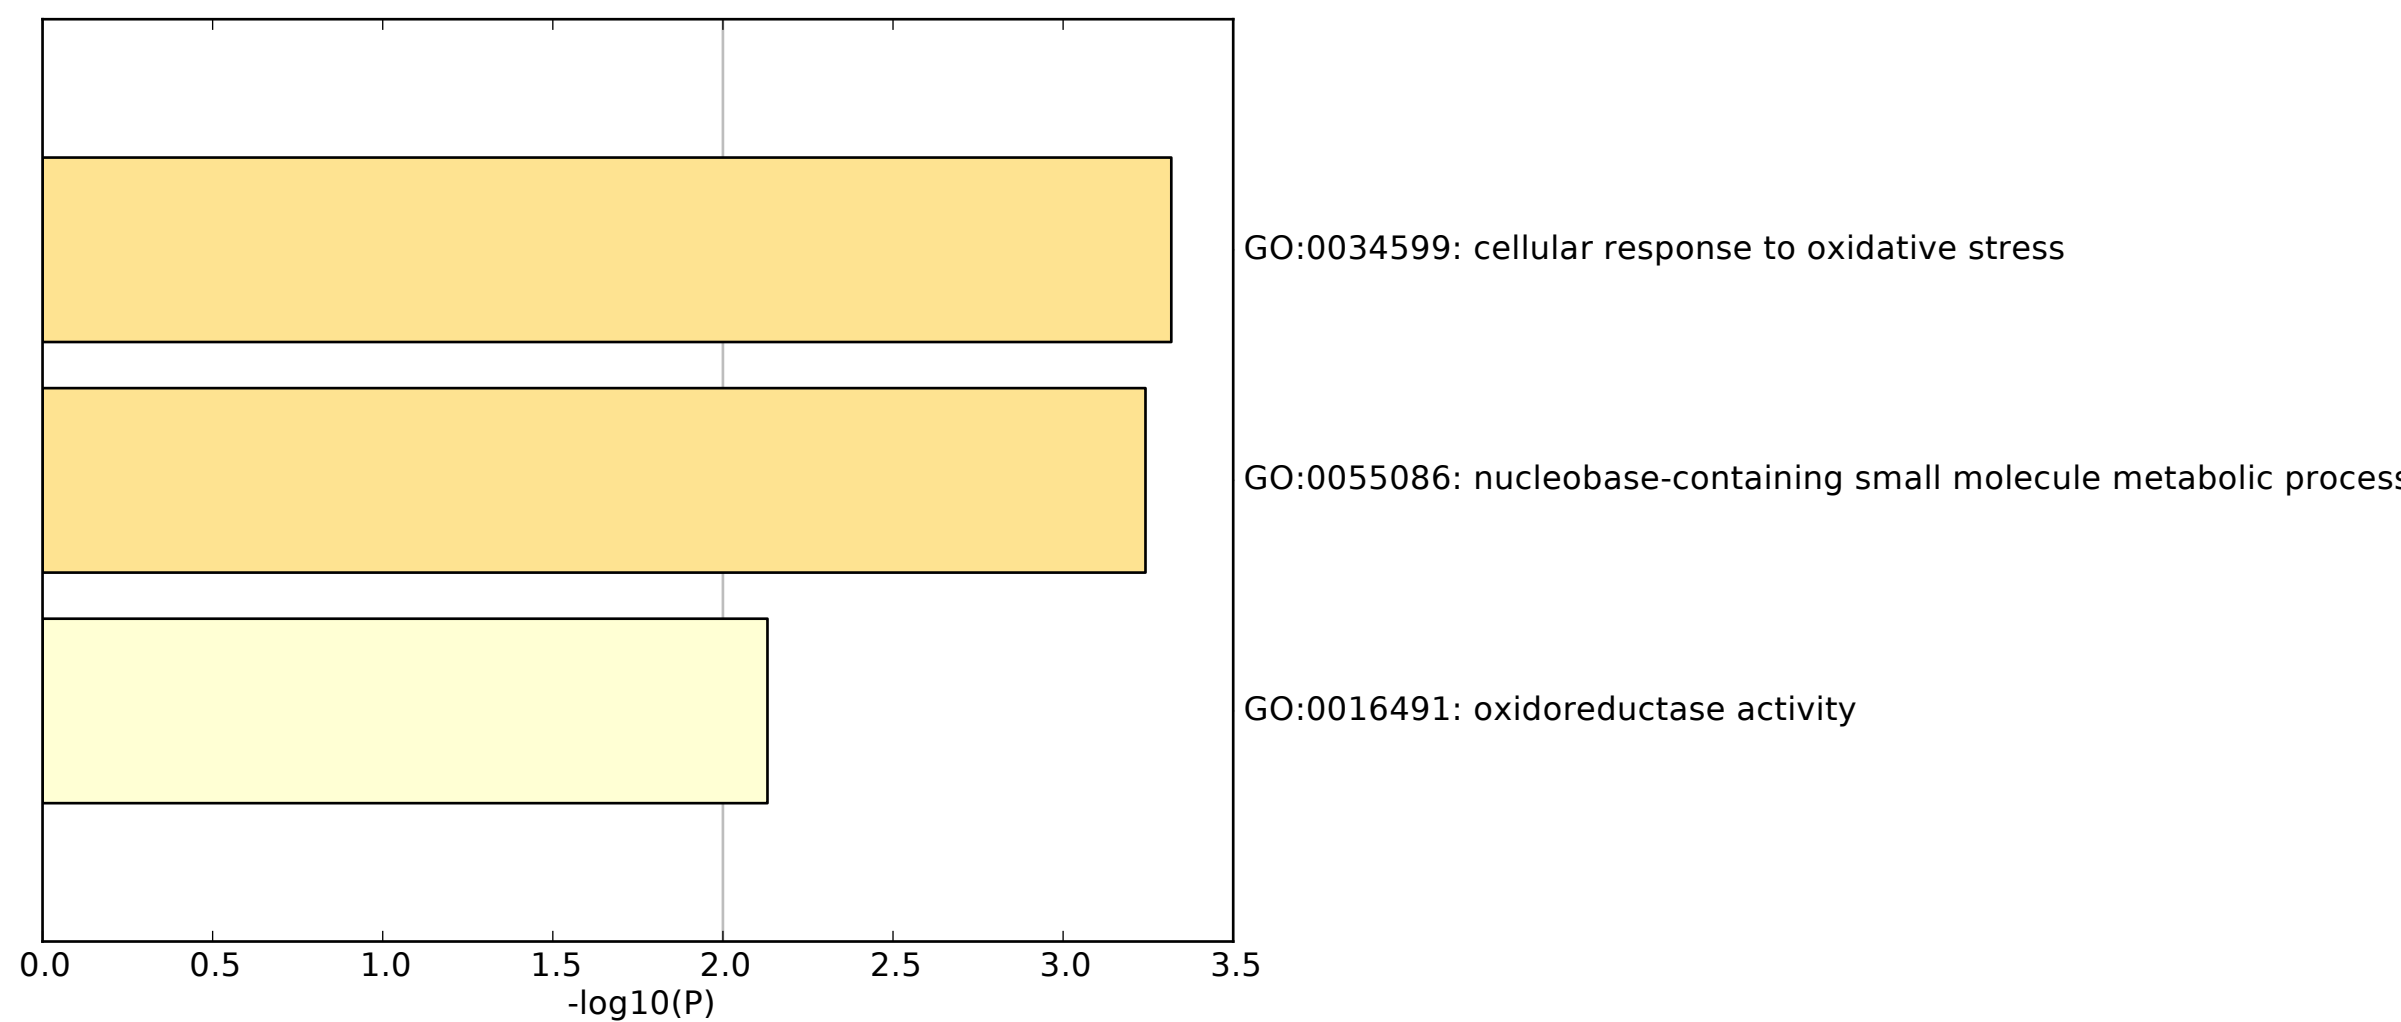

Supplement: Supplemental_Information_2.zip [file Supplemental_Information_2.zip]
